# Supplementary material
Source: HighWire-hosted journal article supplement (https://www.rcpjournals.org/highwire/filestream/14303/field_highwire_adjunct_files/0/Forster_Supplementary_material_S1.pdf)
Supplement: Forster_Supplementary_material_S1.pdf [file Forster_Supplementary_material_S1.pdf]

Supplementary Table S1- Area under ROC and PRC for NEWS2, additive score combining NEWS2 and maximum score in the preceding 24 hours, NEWS-FiO2 and additive score combining current NEWS-FiO2 and maximum NEWS-FiO2 in the preceding 24 hours

| Prediction of outcome of death within 24 hours of an observation |                     | NEWS2               | Additive NEWS2 + max NEWS2 in previous 24 hrs | NEWS2 fio2          | Additive NEWS2 fio2 + max NEWS2 fio2 in preceding 24 hrs |
|------------------------------------------------------------------|---------------------|---------------------|-----------------------------------------------|---------------------|----------------------------------------------------------|
| All Respiratory 2015-2017                                        | Area under ROC      | 0.888 (0.881-0.895) | 0.902 (0.895-0.909)                           | 0.890 (0.882-0.897) | 0.901 (0.894-0.908)                                      |
|                                                                  | Area under PR curve | 0.140               | 0.144                                         | 0.158               | 0.167                                                    |
| Scale 2 Cohort 2015-2017                                         | Area under ROC      | 0.857 (0.838-0.877) | 0.880 (0.862-0.898)                           | 0.865 (0.847-0.884) | 0.883 (0.866-0.900)                                      |
|                                                                  | Area under PR curve | 0.115               | 0.118                                         | 0.123               | 0.132                                                    |
| All Respiratory 2017-2019                                        | Area under ROC      | 0.880 (0.873-0.887) | 0.898 (0.892-0.905)                           | 0.887 (0.881-0.894) | 0.900 (0.894-0.907)                                      |
|                                                                  | Area under PR curve | 0.134               | 0.144                                         | 0.145               | 0.155                                                    |
| Scale 2 cohort 207-2019                                          | Area under ROC      | 0.878 (0.860-0.897) | 0.903 (0.885-0.921)                           | 0.880 (0.861-0.899) | 0.899 (0.881-0.918)                                      |
|                                                                  | Area under PR curve | 0.100               | 0.121                                         | 0.102               | 0.128                                                    |

Supplementary Table S2 a)- Cut points for escalation with additive score combining maximum score in previous 24 hours and current NEWS2 matched to the NEWS2 score with equivalent sensitivity

| 2015-2017 Derivation Cohort |             |             |           |             |             | 2017-2019 Validation Cohort |             |             |           |             |             |
|-----------------------------|-------------|-------------|-----------|-------------|-------------|-----------------------------|-------------|-------------|-----------|-------------|-------------|
| Additive Score              |             |             | NEWS 2    |             |             | Additive Score              |             |             | NEWS 2    |             |             |
| Cut point                   | Sensitivity | Specificity | Cut point | Sensitivity | Specificity | Cut point                   | Sensitivity | Specificity | Cut point | Sensitivity | Specificity |
| 0                           | 1.00        | 0.00        | 0         | 1.00        | 0.00        | 0                           | 1.00        | 0.00        | 0         | 1.00        | 0.00        |
| 1                           | 1.00        | 0.02        |           |             |             | 1                           | 1.00        | 0.01        |           |             |             |
| 2                           | 1.00        | 0.06        |           |             |             | 2                           | 1.00        | 0.04        | 1         | 1.00        | 0.09        |
| 3                           | 1.00        | 0.12        | 1         | 1.00        | 0.12        | 3                           | 1.00        | 0.09        |           |             |             |
| 4                           | 1.00        | 0.19        |           |             |             | 4                           | 0.99        | 0.16        |           |             |             |
| 5                           | 0.99        | 0.27        | 2         | 0.99        | 0.27        | 5                           | 0.99        | 0.23        | 2         | 0.99        | 0.24        |
| 6                           | 0.99        | 0.35        |           |             |             | 6                           | 0.99        | 0.31        |           |             |             |
| 7                           | 0.98        | 0.43        | 3         | 0.97        | 0.43        | 7                           | 0.98        | 0.39        |           |             |             |
| 8                           | 0.96        | 0.51        |           |             |             | 8                           | 0.97        | 0.47        | 3         | 0.97        | 0.40        |
| 9                           | 0.95        | 0.58        | 4         | 0.93        | 0.60        | 9                           | 0.95        | 0.55        |           |             |             |
| 10                          | 0.93        | 0.65        |           |             |             | 10                          | 0.94        | 0.62        | 4         | 0.93        | 0.56        |
| 11                          | 0.90        | 0.72        |           |             |             | 11                          | 0.91        | 0.69        |           |             |             |
| <b>12</b>                   | <b>0.87</b> | <b>0.78</b> | <b>5</b>  | <b>0.87</b> | <b>0.72</b> | <b>12</b>                   | <b>0.89</b> | <b>0.75</b> | <b>5</b>  | <b>0.88</b> | <b>0.69</b> |
| 13                          | 0.83        | 0.83        | 6         | 0.80        | 0.82        | 13                          | 0.85        | 0.80        |           |             |             |
| 14                          | 0.79        | 0.87        |           |             |             | 14                          | 0.80        | 0.85        | 6         | 0.80        | 0.80        |
| <b>15</b>                   | <b>0.72</b> | <b>0.90</b> | <b>7</b>  | <b>0.68</b> | <b>0.90</b> | <b>15</b>                   | <b>0.74</b> | <b>0.88</b> | <b>7</b>  | <b>0.70</b> | <b>0.88</b> |
| 16                          | 0.64        | 0.92        |           |             |             | 16                          | 0.68        | 0.91        |           |             |             |
| 17                          | 0.57        | 0.94        | 8         | 0.57        | 0.94        | 17                          | 0.61        | 0.94        | 8         | 0.59        | 0.93        |
| 18                          | 0.50        | 0.96        | 9         | 0.45        | 0.97        | 18                          | 0.53        | 0.95        | 9         | 0.46        | 0.96        |
| 19                          | 0.43        | 0.97        |           |             |             | 19                          | 0.44        | 0.97        |           |             |             |
| 20                          | 0.36        | 0.98        | 10        | 0.32        | 0.98        | 20                          | 0.36        | 0.98        | 10        | 0.32        | 0.98        |
| 21                          | 0.28        | 0.99        |           |             |             | 21                          | 0.29        | 0.99        |           |             |             |
| 22                          | 0.22        | 0.99        | 11        | 0.20        | 0.99        | 22                          | 0.23        | 0.99        | 11        | 0.23        | 0.99        |
| 23                          | 0.16        | 1.00        |           |             |             | 23                          | 0.18        | 0.99        |           |             |             |
| 24                          | 0.13        | 1.00        | 12        | 0.13        | 1.00        | 24                          | 0.14        | 1.00        | 12        | 0.15        | 1.00        |
| 25                          | 0.08        | 1.00        | 13        | 0.07        | 1.00        | 25                          | 0.11        | 1.00        |           |             |             |
| 26                          | 0.06        | 1.00        |           |             |             | 26                          | 0.09        | 1.00        | 13        | 0.09        | 1.00        |
| 27                          | 0.04        | 1.00        | 14        | 0.04        | 1.00        | 27                          | 0.06        | 1.00        | 14        | 0.04        | 1.00        |
| 28                          | 0.02        | 1.00        | 15        | 0.02        | 1.00        | 28                          | 0.04        | 1.00        |           |             |             |
| 29                          | 0.02        | 1.00        |           |             |             | 29                          | 0.02        | 1.00        | 15        | 0.02        | 1.00        |
| 30                          | 0.01        | 1.00        |           |             |             | 30                          | 0.01        | 1.00        |           |             |             |
| 31                          | 0.01        | 1.00        | 16        | 0.00        | 1.00        | 31                          | 0.01        | 1.00        | 16        | 0.00        | 1.00        |
| 32                          | 0.00        | 1.00        |           |             |             | 32                          | 0.00        | 1.00        | 17        | 0.00        | 1.00        |
| 33                          | 0.00        | 1.00        | 17        | 0.00        | 1.00        | 33                          | 0.00        | 1.00        |           |             |             |

Supplementary Table S2 b)- Cut points for Additive NEWS2 score matched to NEWS2 score with closest matched sensitivity for death in 24 hours- Scale 2 cohort with a diagnosis of COPD

| 2015-2017 Derivation Cohort |             |             |           |             |             | 2017-2019 Validation Cohort |             |             |           |             |             |
|-----------------------------|-------------|-------------|-----------|-------------|-------------|-----------------------------|-------------|-------------|-----------|-------------|-------------|
| Additive Score              |             |             | NEWS 2    |             |             | Additive Score              |             |             | NEWS 2    |             |             |
| Cut point                   | Sensitivity | Specificity | Cut point | Sensitivity | Specificity | Cut point                   | Sensitivity | Specificity | Cut point | Sensitivity | Specificity |
| 0                           | 1.00        | 0.00        | 0         | 1.00        | 0.00        | 0                           | 1.00        | 0.00        | 0         | 1.00        | 0.00        |
| 1                           | 1.00        | 0.02        |           |             |             | 1                           | 1.00        | 0.01        | 1         | 1.00        | 0.13        |
| 2                           | 1.00        | 0.05        |           |             |             | 2                           | 1.00        | 0.04        |           |             |             |
| 3                           | 1.00        | 0.12        | 1         | 1.00        | 0.14        | 3                           | 0.98        | 0.11        |           |             |             |
| 4                           | 0.99        | 0.20        |           |             |             | 4                           | 0.98        | 0.18        |           |             |             |
| 5                           | 0.99        | 0.28        |           |             |             | 2                           | 0.97        | 0.30        |           |             |             |
| 6                           | 0.97        | 0.37        |           |             |             | 6                           | 0.98        | 0.37        |           |             |             |
| 7                           | 0.95        | 0.46        |           |             |             | 3                           | 0.95        | 0.47        |           |             |             |
| 8                           | 0.93        | 0.55        |           |             |             | 8                           | 0.95        | 0.56        | 3         | 0.95        | 0.47        |
| 9                           | 0.91        | 0.63        |           |             |             | 4                           | 0.87        | 0.64        | 9         | 0.93        | 0.65        |
| 10                          | 0.87        | 0.71        |           |             |             | 10                          | 0.89        | 0.73        |           |             |             |
| 11                          | 0.82        | 0.77        |           |             |             | 11                          | 0.85        | 0.80        |           |             |             |
| <b>12</b>                   | <b>0.77</b> | <b>0.83</b> | <b>5</b>  | <b>0.77</b> | <b>0.77</b> | <b>12</b>                   | <b>0.83</b> | <b>0.85</b> | <b>5</b>  | <b>0.81</b> | <b>0.79</b> |
| 13                          | 0.70        | 0.87        | 6         | 0.68        | 0.87        | 13                          | 0.76        | 0.89        | 6         | 0.71        | 0.88        |
| 14                          | 0.66        | 0.91        |           |             |             | 14                          | 0.70        | 0.92        |           |             |             |
| <b>15</b>                   | <b>0.58</b> | <b>0.94</b> |           |             |             | <b>7</b>                    | <b>0.53</b> | <b>0.93</b> |           |             |             |
| 16                          | 0.51        | 0.96        |           |             |             | 16                          | 0.54        | 0.96        |           |             |             |
| 17                          | 0.44        | 0.97        |           |             |             | 8                           | 0.43        | 0.96        |           |             |             |
| 18                          | 0.38        | 0.98        |           |             |             | 18                          | 0.35        | 0.98        | 9         | 0.28        | 0.99        |
| 19                          | 0.32        | 0.99        |           |             |             | 9                           | 0.32        | 0.98        | 19        | 0.25        | 0.99        |
| 20                          | 0.28        | 0.99        | 10        | 0.24        | 0.99        | 20                          | 0.17        | 0.99        |           |             |             |
| 21                          | 0.22        | 0.99        |           |             |             | 21                          | 0.13        | 1.00        |           |             |             |
| 22                          | 0.17        | 1.00        |           |             |             | 11                          | 0.15        | 1.00        | 22        | 0.12        | 1.00        |
| 23                          | 0.11        | 1.00        | 12        | 0.10        | 1.00        | 23                          | 0.10        | 1.00        |           |             |             |
| 24                          | 0.07        | 1.00        | 13        | 0.06        | 1.00        | 24                          | 0.08        | 1.00        |           |             |             |
| 25                          | 0.05        | 1.00        |           |             |             | 25                          | 0.07        | 1.00        |           |             |             |
| 26                          | 0.03        | 1.00        |           |             |             | 14                          | 0.03        | 1.00        |           |             |             |
| 27                          | 0.02        | 1.00        |           |             |             | 27                          | 0.03        | 1.00        | 14        | 0.03        | 1.00        |
| 28                          | 0.01        | 1.00        |           |             |             | 15                          | 0.01        | 1.00        | 28        | 0.02        | 1.00        |
| 29                          | 0.01        | 1.00        |           |             |             | 29                          | 0.01        | 1.00        | 15        | 0.01        | 1.00        |
| 30                          | 0.00        | 1.00        |           |             |             | 16                          | 0.00        | 1.00        | 30        | 0.00        | 1.00        |
|                             |             |             |           |             |             |                             |             |             |           |             |             |
